# Supplementary material for: Future changes in spatiotemporal precipitation patterns of the East Asian summer monsoon and associated uncertainty factors
Source: Copernicus journal article supplement (doi:10.5194/esd-2024-34), 2024-10-30
Supplement: Supplementary file 1 [file esd-2024-34-supplement.pdf]

**Future changes in spatiotemporal precipitation patterns of the East Asian summer monsoon and associated uncertainty factors**

Yeon-Hee Kim<sup>1</sup>, Seung-Ki Min<sup>1,2</sup>

<sup>1</sup>Division of Environmental Science and Engineering, Pohang University of Science and Technology, Pohang, 37673, South Korea

<sup>2</sup>Institute for Convergence Research and Education in Advanced Technology, Yonsei University, Incheon, 21983, South Korea

*Correspondence to:* Seung-Ki Min (skmin@postech.ac.kr)

Contents:

Table S1 and S2

Figure S1 and S2

19 **Table S1. List of CMIP6 models used in this study**

| <b>Model</b>         | <b>Institution</b>                                                                                                                                                                                    | <b>Resolution<br/>(Long. × Lat.)</b> |
|----------------------|-------------------------------------------------------------------------------------------------------------------------------------------------------------------------------------------------------|--------------------------------------|
| <b>ACCESS-CM2</b>    | Commonwealth Scientific and Industrial Research Organisation and Australian Research Council                                                                                                          | 192 × 144                            |
| <b>ACCESS-ESM1-5</b> | Centre of Excellence for Climate System Science, Australia                                                                                                                                            | 192 × 145                            |
| <b>BCC-CSM2-MR</b>   | Beijing Climate Center, China Meteorological Administration, China                                                                                                                                    | 320 × 160                            |
| <b>CanESM5</b>       | Canadian Centre for Climate Modelling and Analysis, Canada                                                                                                                                            | 128 × 64                             |
| <b>CESM2</b>         | National Center for Atmospheric Research                                                                                                                                                              | 288 × 192                            |
| <b>CESM2-WACCM</b>   |                                                                                                                                                                                                       | 288 × 192                            |
| <b>CMCC-CM2-SR5</b>  | Fondazione Centro Euro-Mediterraneo sui Cambiamenti Climatici                                                                                                                                         | 288 × 192                            |
| <b>CNRM-CM6-1</b>    | Centre National de Recherches Météorologiques,                                                                                                                                                        | 256 × 128                            |
| <b>CNRM-ESM2-1</b>   | Météo-France, France                                                                                                                                                                                  | 256 × 128                            |
| <b>EC-Earth3</b>     | EC-Earth-Consortium                                                                                                                                                                                   | 512 × 256                            |
| <b>EC-Earth3-Veg</b> |                                                                                                                                                                                                       | 512 × 256                            |
| <b>FGOALS-g3</b>     | Chinese Academy of Sciences, China                                                                                                                                                                    | 180 × 80                             |
| <b>GFDL-ESM4</b>     | Geophysical Fluid Dynamics Laboratory, USA                                                                                                                                                            | 288 × 180                            |
| <b>INM-CM4-8</b>     | Institute for Numerical Mathematics, Russia                                                                                                                                                           | 180 × 120                            |
| <b>INM-CM5-0</b>     |                                                                                                                                                                                                       | 180 × 120                            |
| <b>IPSL-CM6A-LR</b>  | Institut Pierre-Simon Laplace, France                                                                                                                                                                 | 144 × 143                            |
| <b>KACE-1-0-G</b>    | National Institute of Meteorological Science/Korea Meteorological Administration, Korea                                                                                                               | 192 × 144                            |
| <b>MIROC6</b>        | Atmosphere and Ocean Research Institute (AORI),                                                                                                                                                       | 256 × 128                            |
| <b>MIROC-ES2L</b>    | National Institute for Environmental Studies (NIES), Japan Agency for Marine-Earth Science and Technology (JAMSTEC), RIKEN Center for Computational Science (R-CCS), Japan                            | 128 × 64                             |
| <b>MPI-ESM1-2-HR</b> | Max Planck Institute for Meteorology, Germany                                                                                                                                                         | 384 × 192                            |
| <b>MPI-ESM1-2-LR</b> |                                                                                                                                                                                                       | 192 × 96                             |
| <b>MRI-ESM2-0</b>    | Meteorological Research Institute, Japan                                                                                                                                                              | 320 × 160                            |
| <b>NorESM2-LM</b>    | Norwegian Earth System Model (NorESM) climate modeling Consortium of the Center for International Climate Research (CICERO),                                                                          | 144 × 96                             |
| <b>NorESM2-MM</b>    | Norwegian Meteorological Institute, National Energy Research Scientific Computing Center (NERSC), Norsk Institutt for Luftforskning (NILU), University of Bergen, University of Oslo, and UNI, Norway | 288 × 192                            |
| <b>UKESM1-0-LL</b>   | Met Office Hadley Centre, UK                                                                                                                                                                          | 192 × 144                            |

20

21 **Table S2. List of CMIP5 models used in this study**

| <b>Model</b>          | <b>Institution</b>                                                                                                                                                        | <b>Resolution<br/>(Long. × Lat.)</b> |
|-----------------------|---------------------------------------------------------------------------------------------------------------------------------------------------------------------------|--------------------------------------|
| <b>bcc-csm1-1</b>     | Beijing Climate Center, China Meteorological Administration, China                                                                                                        | 128 × 64                             |
| <b>bcc-csm1-1-m</b>   |                                                                                                                                                                           | 320 × 160                            |
| <b>BNU-ESM</b>        | Beijing Normal University, China                                                                                                                                          | 128 × 64                             |
| <b>CanESM2</b>        | Canadian Centre for Climate Modelling and Analysis, Canada                                                                                                                | 128 × 64                             |
| <b>CCSM4</b>          | National Center for Atmospheric Research (NCAR), USA                                                                                                                      | 288 × 192                            |
| <b>CNRM-CM5</b>       | Centre National de Recherches Météorologiques, Météo-France, France                                                                                                       | 256 × 128                            |
| <b>CSIRO-Mk3-6-0</b>  | Australian Commonwealth Scientific and Industrial Research Organization, Australia                                                                                        | 192 × 96                             |
| <b>FGOALS-g2</b>      | Institute of Atmospheric Physics, Chinese Academy of Sciences, China                                                                                                      | 128 × 60                             |
| <b>GFDL-CM3</b>       | Geophysical Fluid Dynamics Laboratory, USA                                                                                                                                | 144 × 90                             |
| <b>GFDL-ESM2G</b>     |                                                                                                                                                                           | 144 × 90                             |
| <b>GFDL-ESM2M</b>     |                                                                                                                                                                           | 144 × 90                             |
| <b>HadGEM2-AO</b>     | Met Office Hadley Centre, UK                                                                                                                                              | 192 × 145                            |
| <b>HadGEM2-ES</b>     |                                                                                                                                                                           | 192 × 145                            |
| <b>IPSL-CM5A-LR</b>   | Institut Pierre-Simon Laplace, France                                                                                                                                     | 96 × 96                              |
| <b>IPSL-CM5A-MR</b>   |                                                                                                                                                                           | 144 × 143                            |
| <b>MIROC5</b>         | Atmosphere and Ocean Research Institute (AORI), National Institute for Environmental Studies (NES), Japan Agency for Marine-Earth Science and Technology (JAMSTEC), Japan | 256 × 128                            |
| <b>MIROC-ESM</b>      |                                                                                                                                                                           | 128 × 64                             |
| <b>MIROC-ESM-CHEM</b> |                                                                                                                                                                           | 128 × 64                             |
| <b>MPI-ESM-LR</b>     | Max Planck Institute for Meteorology, Germany                                                                                                                             | 192 × 96                             |
| <b>MPI-ESM-MR</b>     |                                                                                                                                                                           | 192 × 96                             |
| <b>MRI-CGCM3</b>      | Meteorological Research Institute, Japan                                                                                                                                  | 320 × 160                            |
| <b>NorESM1-M</b>      | Norwegian Climate Centre, Norway                                                                                                                                          | 144 × 96                             |

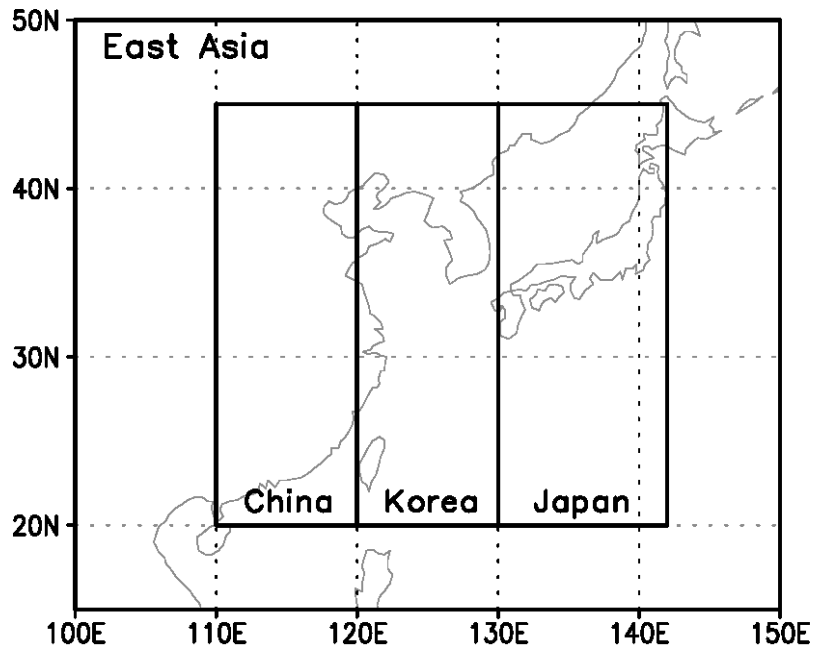

22

23 **Figure S1. Geographical location of the East Asian domain and three subregions—China, Korea, and Japan—analyzed**  
24 **in this study**

25

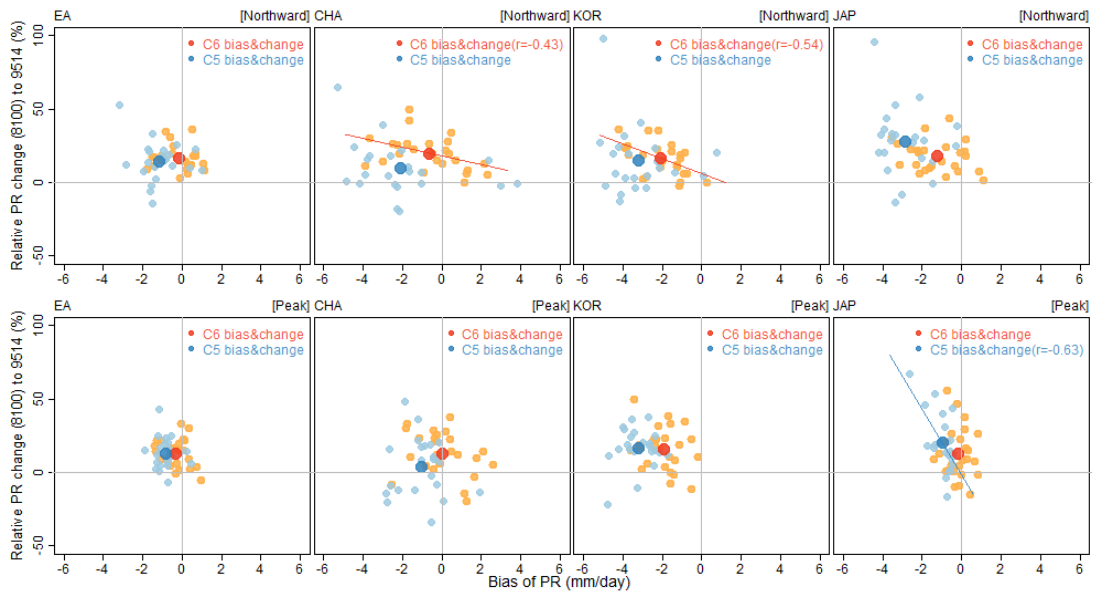

26

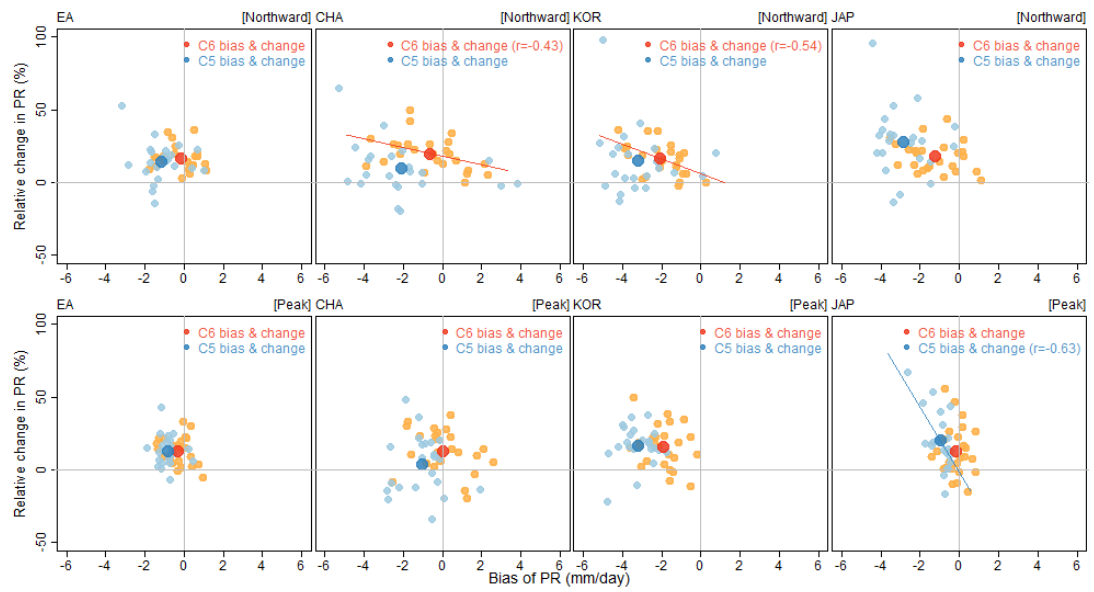

27

28 **Figure S2. Scatter plot of the association between modeling bias and predictions of future precipitation (PR) change**  
 29 **over the long term (2081–2100) when using the SSP5-8.5 climate change scenario in CMIP6 (orange) and RCP8.5 in**  
 30 **CMIP5 (blue). Biases were calculated relative to the observed precipitation data from 1995–2014. Different graphs**  
 31 **present the results of models analyzing the Eastern Asian (EA) domain and the subregions of China (CHA), Korea**  
 32 **(KOR), and Japan (JAP). Correlation coefficients (r) are provided from the linear regression slopes (with statistical**  
 33 **significance set at the 10% level).**

34
